# Supplementary material
Source: PubMed Central journal article supplement (PMC7422130)

## SUPPLEMENTAL MATERIALS

**Supplementary Figure 1.** Waterfall plots displaying gene mutations, karyotype abnormalities and information about treatment with JAK inhibitors of the overt PMF (A), pre-PMF (B) and post-PV/ET MF (C) cohorts. *Abbreviations:* ET: essential thrombocythemia; HMR: high molecular risk; JAKi: JAK inhibitors.; HMR: high molecular risk; MF: myelofibrosis; PMF: primary myelofibrosis; Pre-PMF: pre-fibrotic primary myelofibrosis; PV: polycythemia vera.

**Supplementary Figure 2. A.** Lollipop plot and table showing type and location along the protein sequence of the 25 *NRAS*<sup>MT</sup> identified in the MF cohort (top) and separately in overt PMF, pre-PMF and post-\*PV/ET MF (bottom). **B.** Lollipop plot and table showing type and location along the protein sequence of the 13 *KRAS*<sup>MT</sup> identified in the MF cohort (top) and separately in overt PMF, pre-PMF and post-\*PV/ET MF (bottom). **C.** Lollipop plot and table showing type and location along the protein sequence of the 26 *CBL*<sup>MT</sup> identified in the MF cohort (top) and separately in overt PMF, pre-PMF and post-\*PV/ET MF (bottom). The number of recurrently detected alterations is indicated by the text within each disc, as well as by disc size. Colors indicate the type of mutation: blue, missense; purple, splice site; orange, nonsense; red, frameshift; gray, in-frame insertion/deletion. All mutations were merged to construct the mutation profile using the web-based tool ProteinPaint (<https://pecan.stjude.cloud/proteinpaint/>). *Abbreviations:* ET: essential thrombocythemia; MF: myelofibrosis; PMF: primary myelofibrosis; Pre-PMF: pre-fibrotic primary myelofibrosis; PV: polycythemia vera; Sec-MF: secondary myelofibrosis; VAF: variant allele frequency

**Supplementary Figure 3. A.** Box plot showing the distribution of variant allele frequency of phenotypic driver mutations (*JAK*, *CALR*, *MPL*) and *RAS/CBL*<sup>MT</sup>. **B.** Box plot showing the distribution of variant allele frequency *NRAS*, *KRAS* and *CBL* mutations separately. *Abbreviations:* <sup>MT</sup>: mutated.

**Supplementary Figure 4.** Kaplan-Meier estimates of overall survival in patients with over PMF (A), pre-PMF (B) and post-PV/ET MF (C) by the presence or absence of *RAS/CBL*<sup>MT</sup>. *Abbreviations:* CI: confidence interval; ET: essential thrombocythemia; MF: myelofibrosis; <sup>MT</sup>: mutated; OS: overall survival; PMF: primary myelofibrosis; pre-PMF: pre-fibrotic primary myelofibrosis; PV: polycythemia vera; <sup>WT</sup>: wild type.

**Supplementary Figure 5.** Five year-cumulative incidence of leukemic transformation survival in patients with over PMF (A), pre-PMF (B) and post-PV/ET MF (C) by the presence or absence of *RAS/CBL*<sup>MT</sup>. *Abbreviations:* CI: confidence interval; CuI: cumulative incidence; ET: essential thrombocythemia; MF: myelofibrosis; <sup>MT</sup>: mutated; PMF: primary myelofibrosis; pre-PMF: pre-fibrotic primary myelofibrosis; PV: polycythemia vera; <sup>WT</sup>: wild type.

**Supplementary Figure 6. A-B.** Cross tables illustrating risk re-distribution of patients according to *RAS/CBL*-enhanced MIPSS70 (**A**) *RAS/CBL*-enhanced MIPSS70-plus (**B**) compared to their original MIPSS70 and MIPSS70-plus categorization, respectively. Coloured bars represent the MIPSS/MIPSS70-plus risk stratification (x-axis) in the context of the stratification based on the new scoring systems (represented by the rows). **C-D.** Three-year ROC curves and AUC values representing the relative prognostic power of standard and *RAS/CBL*-enhanced MIPSS70 (**C**) and MIPSS70-plus (**D**). *Abbreviations:* AIC: Akaike information criterion; AOU: area under curve; LFS: leukemia-free survival; MIPSS70: mutation-enhanced international prognostic score system; OS; overall survival; ROC: receiver operator characteristic.

# Supplementary Figure 1A

## Overt PMF

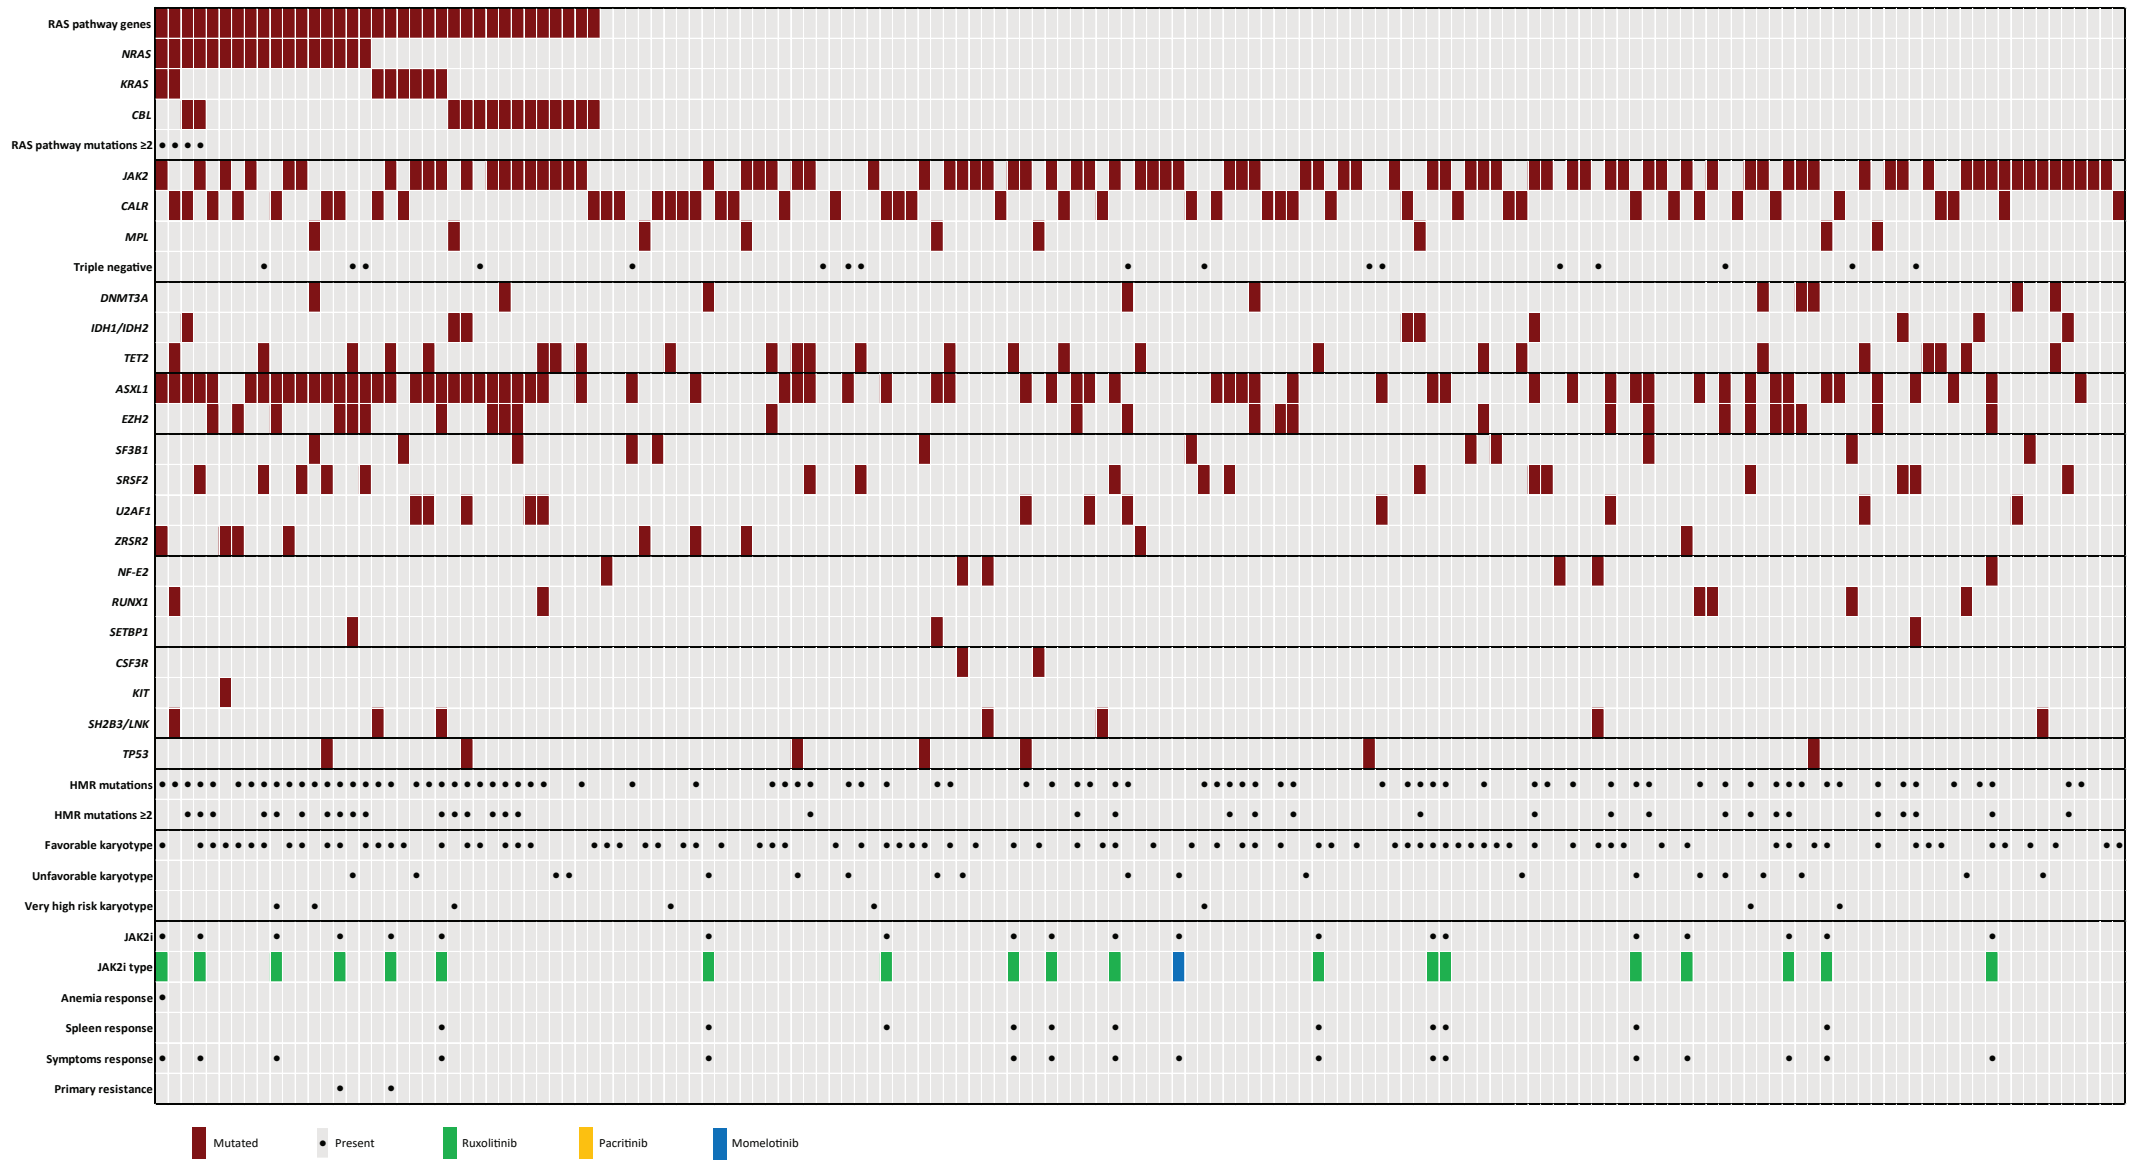

# Supplementary Figure 1B

## Pre-PMF

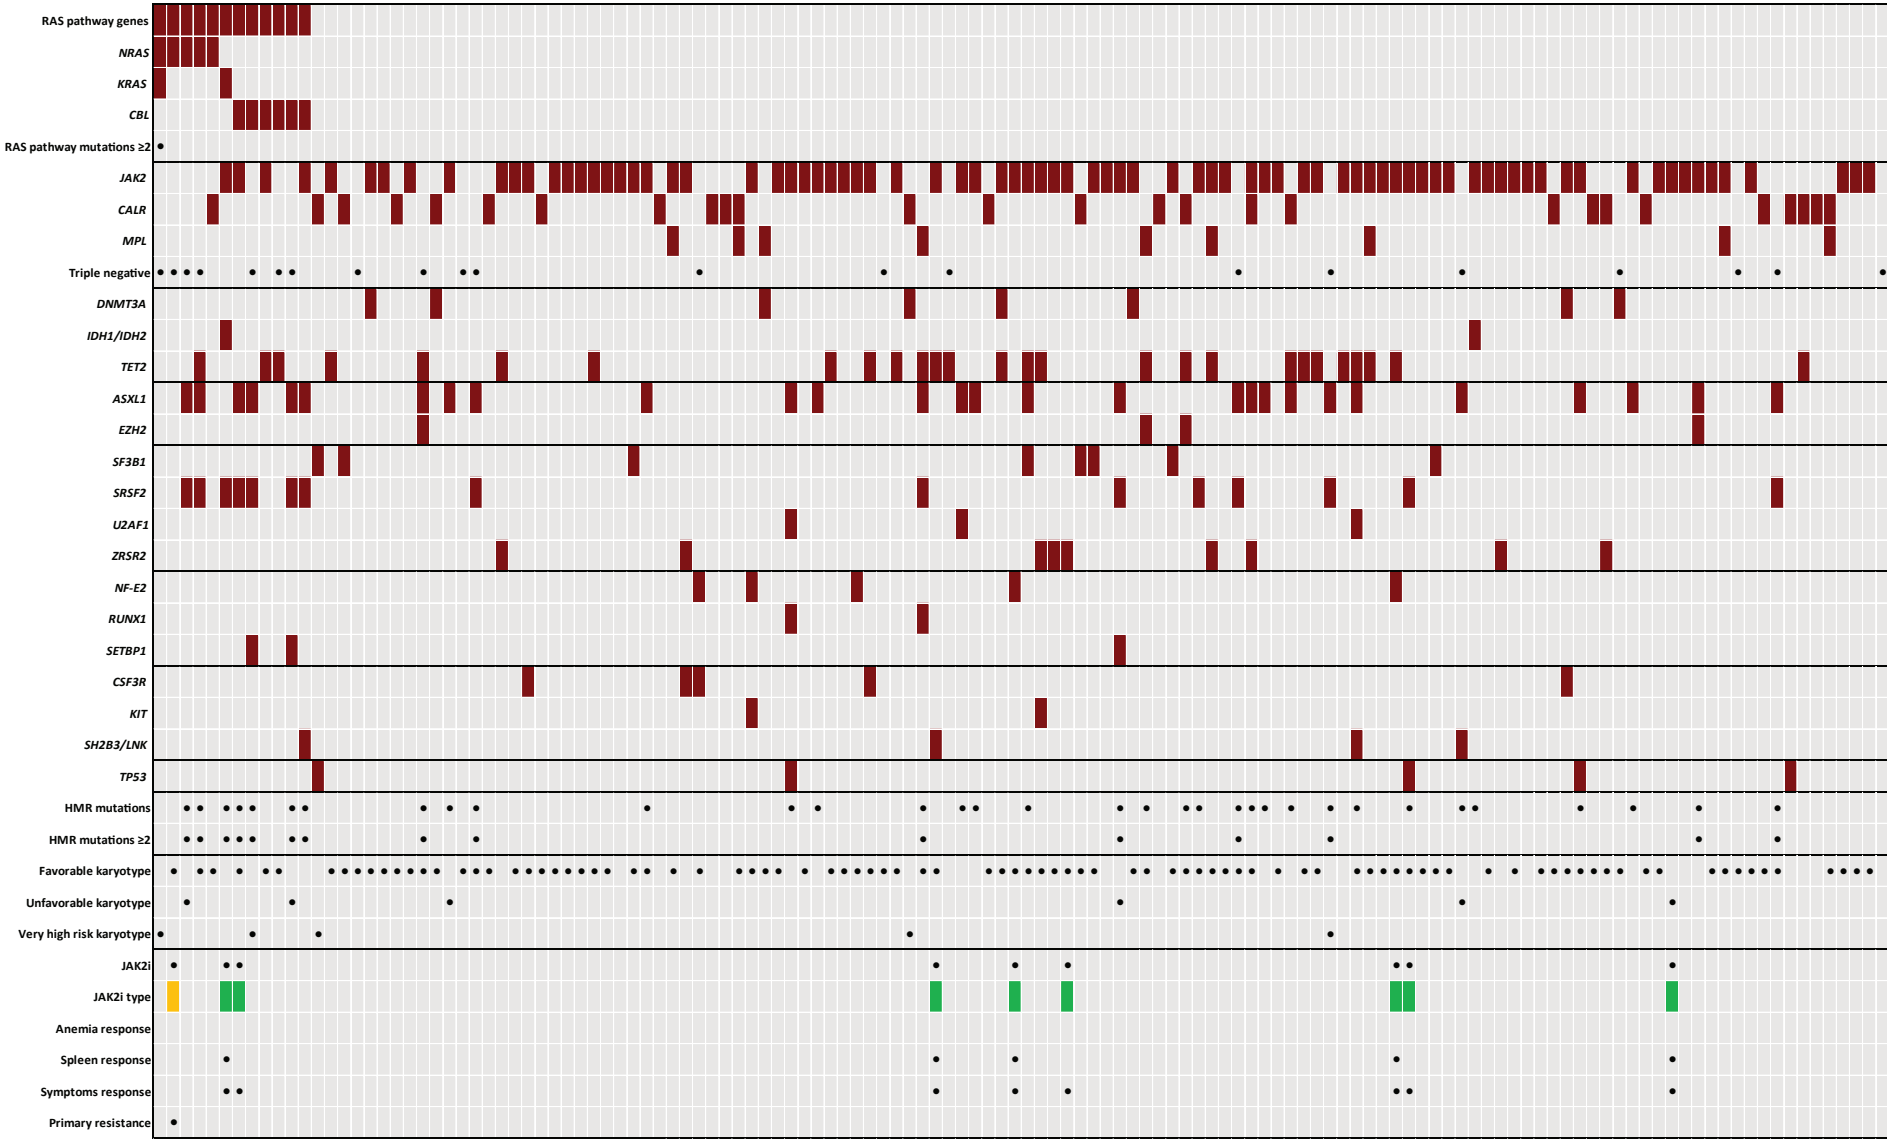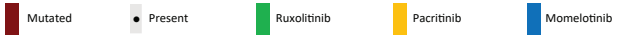

Post-PV/ET MF

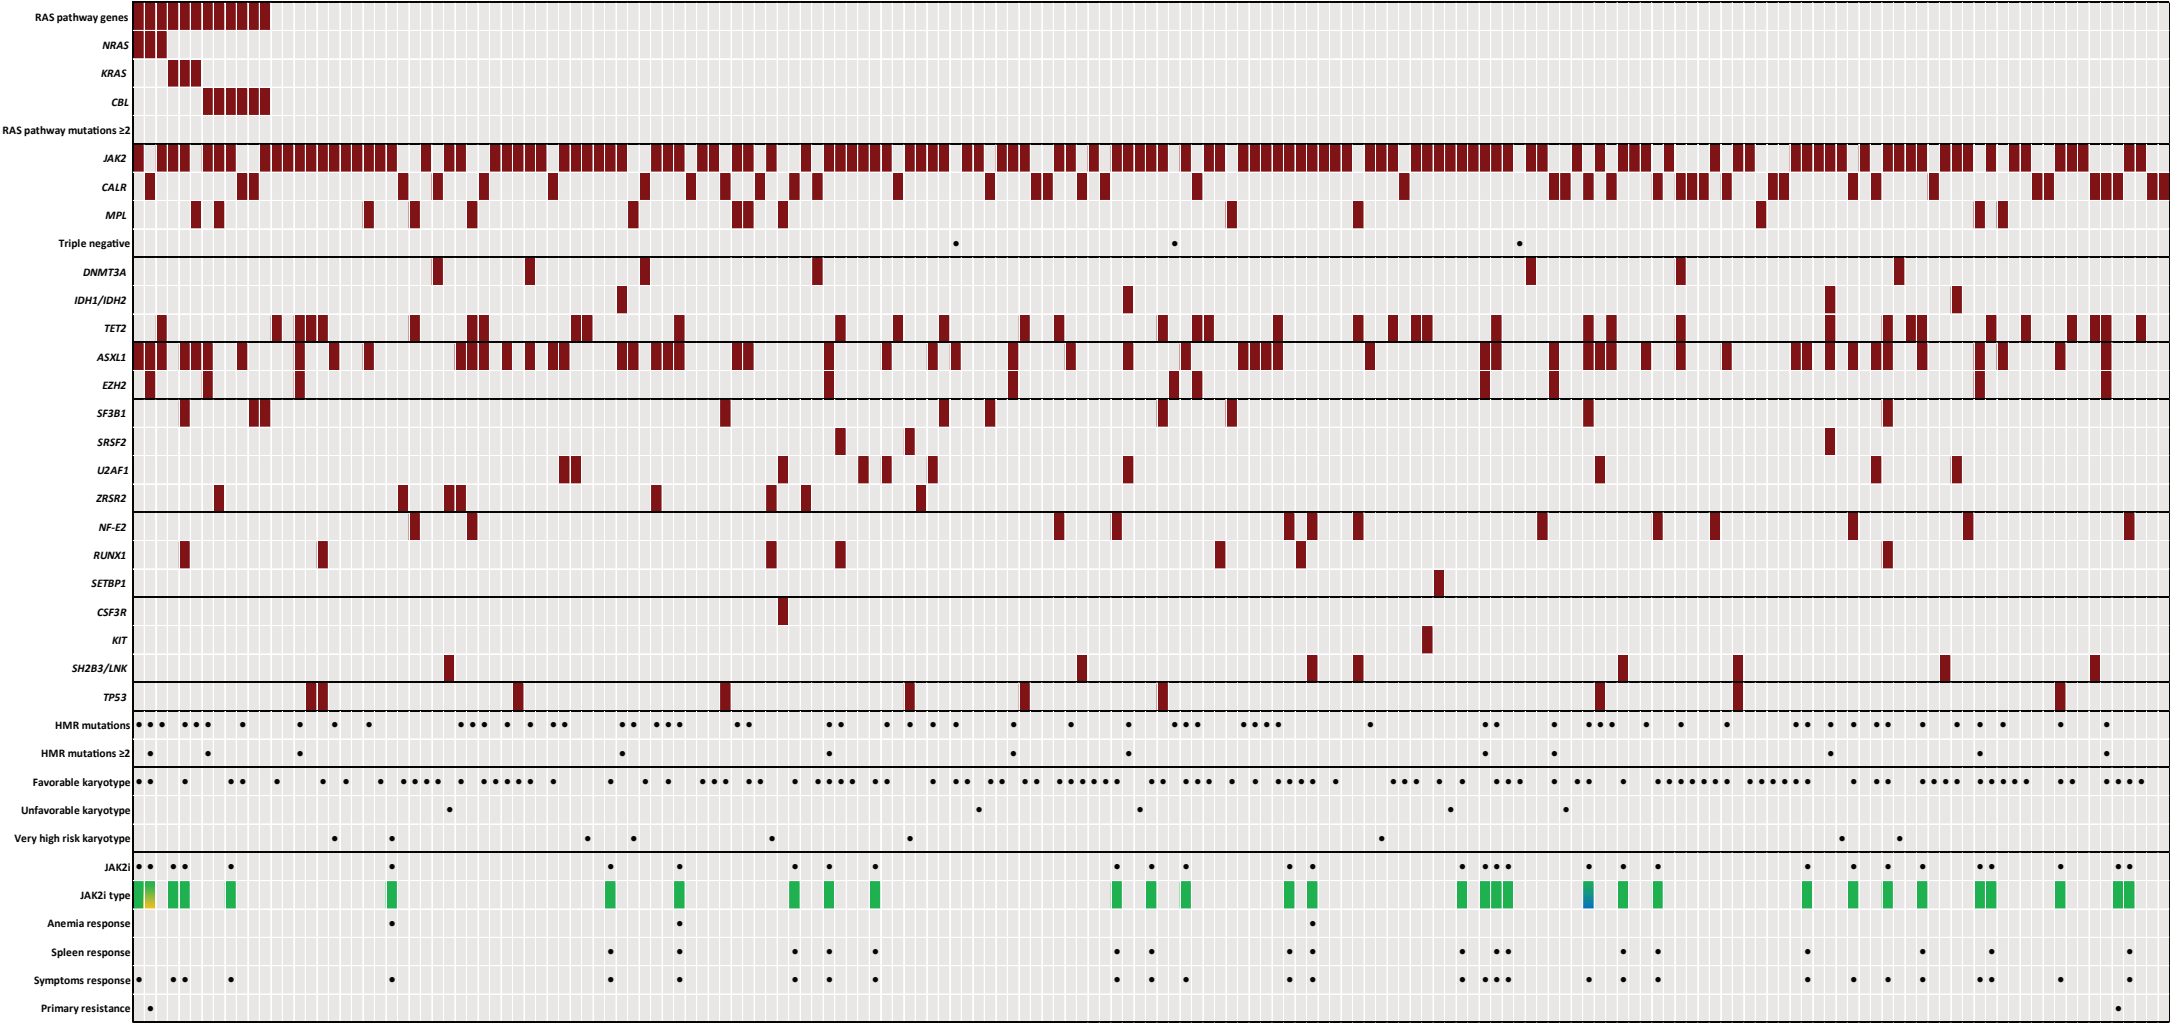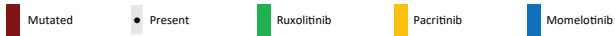

# Supplementary Figure 2A

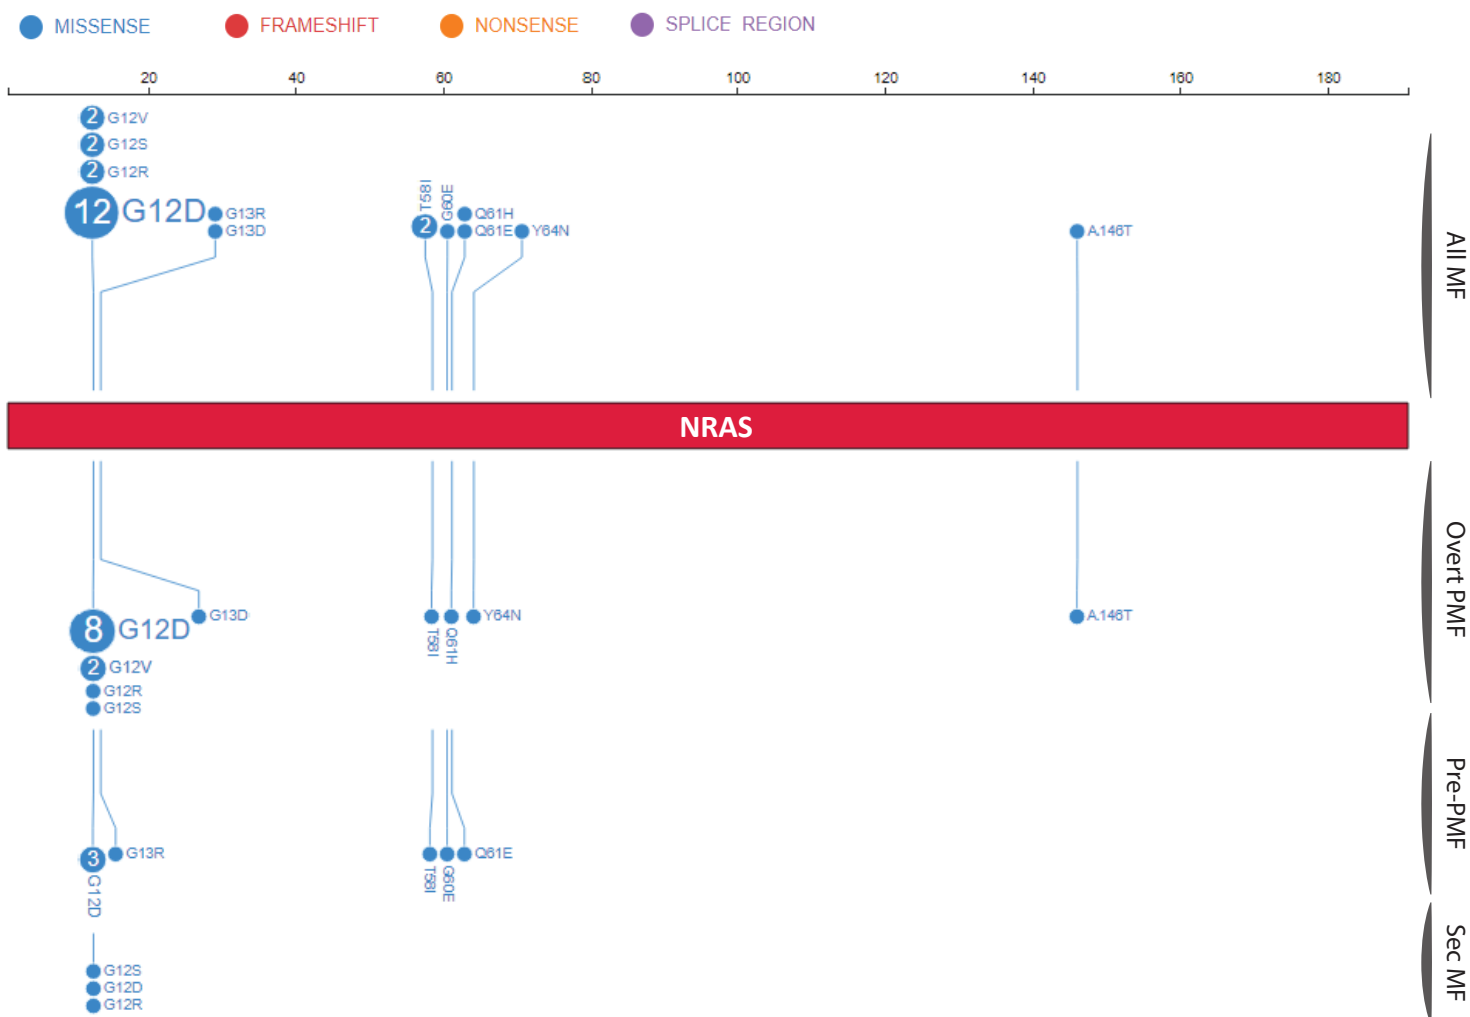

| NRAS         |               |             |                          |                   |      |                   |          |               |  |
|--------------|---------------|-------------|--------------------------|-------------------|------|-------------------|----------|---------------|--|
| Patient code | MF subtype    | Transcript  | Genome location          | Nucleotide change | Exon | Amino acid change | NRAS VAF | Mutation type |  |
| 27           | Overt PMF     | NM_002524.5 | chr1:115258747-115258747 | c.35G>A           | 2    | p.G12D            | 43       | Missense      |  |
| 53           | Overt PMF     | NM_002524.5 | chr1:115256528-115256528 | c.183A>C          | 3    | p.Q61H            | 16       | Missense      |  |
| 65           | Overt PMF     | NM_002524.5 | chr1:115256521-115256521 | c.190T>A          | 3    | p.Y64N            | 39       | Missense      |  |
| 72           | Overt PMF     | NM_002524.5 | chr1:115258747-115258747 | c.35G>A           | 2    | p.G12D            | 47       | Missense      |  |
| 86           | Overt PMF     | NM_002524.5 | chr1:115258744-115258744 | c.38G>A           | 2    | p.G13D            | 39       | Missense      |  |
| 90           | Overt PMF     | NM_002524.5 | chr1:115258747-115258747 | c.35G>A           | 2    | p.G12D            | 12       | Missense      |  |
| 105          | Pre-PMF       | NM_002524.5 | chr1:115256538-115256538 | c.173C>T          | 3    | p.T58I            | 10       | Missense      |  |
| 105          | Pre-PMF       | NM_002524.5 | chr1:115256530-115256530 | c.181C>G          | 3    | p.Q61E            | 9        | Missense      |  |
| 107          | Overt PMF     | NM_002524.5 | chr1:115258748-115258748 | c.34G>A           | 2    | p.G12S            | 9        | Missense      |  |
| 174          | Overt PMF     | NM_002524.5 | chr1:115258748-115258748 | c.34G>C           | 2    | p.G12R            | 20       | Missense      |  |
| 179          | Overt PMF     | NM_002524.5 | chr1:115258747-115258747 | c.35G>A           | 2    | p.G12D            | 3        | Missense      |  |
| 207          | Pre-PMF       | NM_002524.5 | chr1:115258747-115258747 | c.35G>A           | 2    | p.G12D            | 42       | Missense      |  |
| 257          | Overt PMF     | NM_002524.5 | chr1:115258747-115258747 | c.35G>A           | 2    | p.G12D            | 11       | Missense      |  |
| 258          | Overt PMF     | NM_002524.5 | chr1:115258747-115258747 | c.35G>A           | 2    | p.G12D            | 51       | Missense      |  |
| 286          | Overt PMF     | NM_002524.5 | chr1:115258747-115258747 | c.35G>T           | 2    | p.G12V            |          | Missense      |  |
| 292          | Pre-PMF       | NM_002524.5 | chr1:115258747-115258747 | c.35G>A           | 2    | p.G12D            | 27       | Missense      |  |
| 293          | Overt PMF     | NM_002524.5 | chr1:115256538-115256538 | c.173C>T          | 3    | p.T58I            | 4        | Missense      |  |
| 298          | Pre-PMF       | NM_002524.5 | chr1:115256532-115256532 | c.179G>A          | 3    | p.G60E            | 11       | Missense      |  |
| 298          | Pre-PMF       | NM_002524.5 | chr1:115258747-115258747 | c.35G>A           | 2    | p.G12D            | 38       | Missense      |  |
| 332          | Overt PMF     | NM_002524.5 | chr1:115258747-115258747 | c.35G>A           | 2    | p.G12D            | 49       | Missense      |  |
| 343          | Overt PMF     | NM_002524.5 | chr1:115252204-115252204 | c.436G>A          | 4    | p.A146T           | 16       | Missense      |  |
| 395          | Overt PMF     | NM_002524.5 | chr1:115258747-115258747 | c.35G>A           | 2    | p.G12D            | 47       | Missense      |  |
| 431          | Overt PMF     | NM_002524.5 | chr1:115258747-115258747 | c.35G>T           | 2    | p.G12V            | 48       | Missense      |  |
| 440          | Pre-PMF       | NM_002524.5 | chr1:115258745-115258745 | c.37G>C           | 2    | p.G13R            | 44       | Missense      |  |
| 1035         | Post-PV/ET MF | NM_002524.5 | chr1:115258748-115258748 | c.34G>A           | 2    | p.G12S            | 49       | Missense      |  |
| 1123         | Post-PV/ET MF | NM_002524.5 | chr1:115258747-115258747 | c.35G>A           | 2    | p.G12D            | 17       | Missense      |  |
| 1163         | Post-PV/ET MF | NM_002524.5 | chr1:115258748-115258748 | c.34G>C           | 2    | p.G12R            | 9        | Missense      |  |

# Supplementary Figure 2B

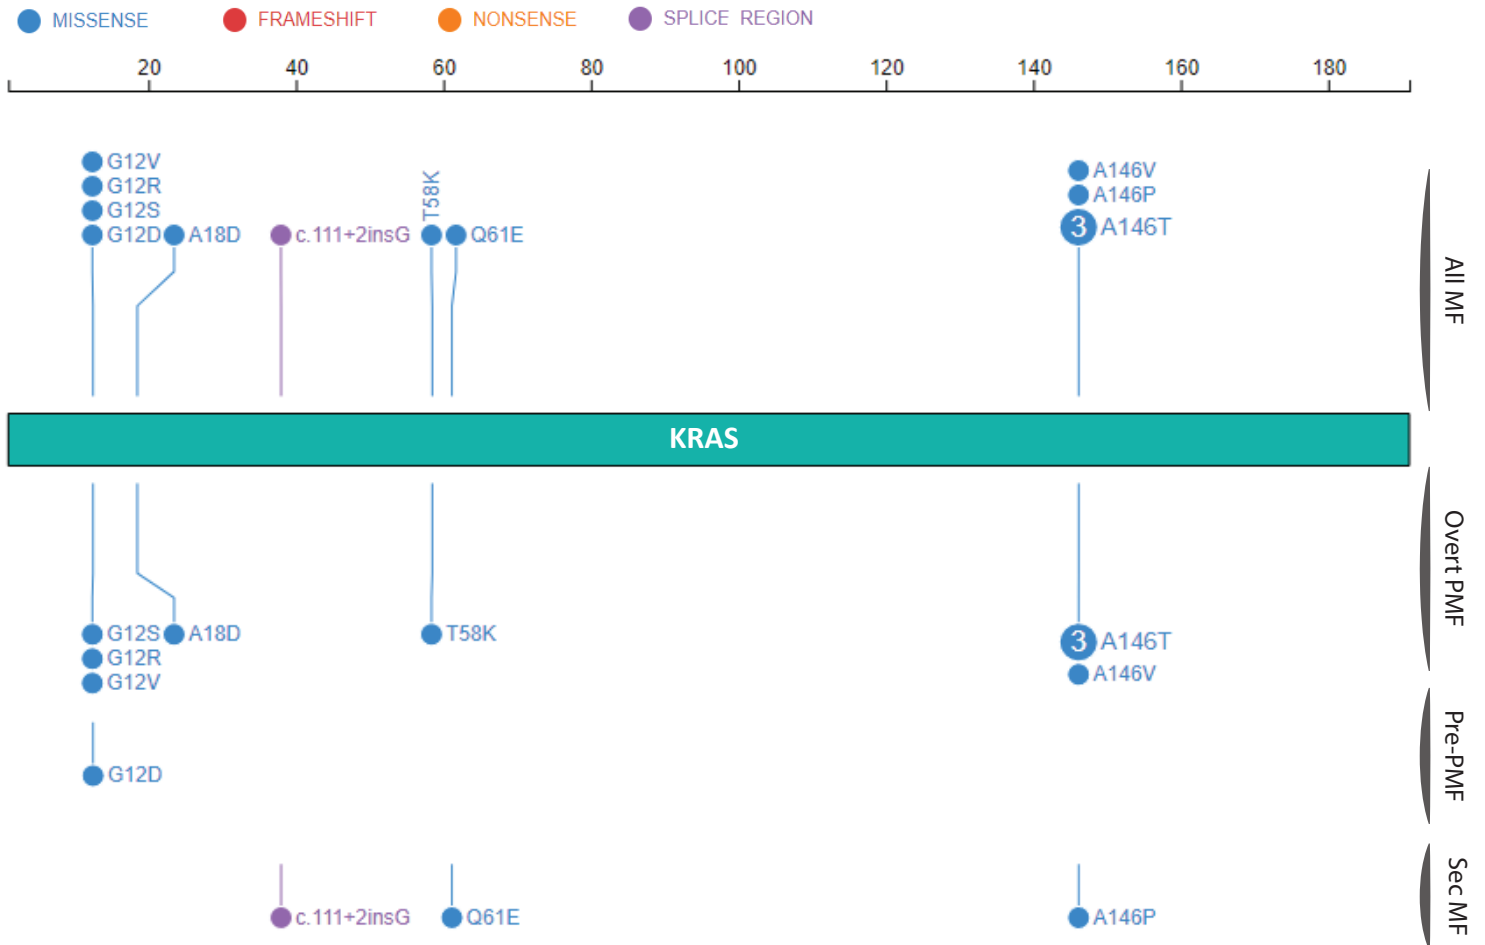

| KRAS         |               |             |                         |                   |             |                   |          |               |
|--------------|---------------|-------------|-------------------------|-------------------|-------------|-------------------|----------|---------------|
| Patient code | MF subtype    | Transcript  | Genome location         | Nucleotide change | Exon/Intron | Amino acid change | KRAS VAF | Mutation type |
| 90           | Overt PMF     | NM_033360.4 | chr12:25378562-25378562 | c.436G>A          | 4           | p.A146T           | 39       | Missense      |
| 140          | Overt PMF     | NM_033360.4 | chr12:25378562-25378562 | c.436G>A          | 4           | p.A146T           | 4        | Missense      |
| 173          | Overt PMF     | NM_033360.4 | chr12:25380285-25380285 | c.173C>A          | 3           | p.T58K            | 13       | Missense      |
| 225          | Overt PMF     | NM_033360.4 | chr12:25398285-25398285 | c.34G>A           | 2           | p.G12S            | 48       | Missense      |
| 255          | Overt PMF     | NM_033360.4 | chr12:25398285-25398285 | c.34G>C           | 2           | p.G12R            | 33       | Missense      |
| 257          | Overt PMF     | NM_033360.4 | chr12:25378562-25378562 | c.436G>A          | 4           | p.A146T           | 9        | Missense      |
| 292          | Pre-PMF       | NM_033360.4 | chr12:25398284-25398284 | c.35G>A           | 2           | p.G12D            | 7        | Missense      |
| 314          | Overt PMF     | NM_033360.4 | chr12:25398284-25398284 | c.35G>T           | 2           | p.G12V            | 25       | Missense      |
| 346          | Overt PMF     | NM_033360.4 | chr12:25378561-25378561 | c.437C>T          | 4           | p.A146V           | 44       | Missense      |
| 358          | Overt PMF     | NM_033360.4 | chr12:25398266-25398266 | c.53C>A           | 2           | p.A18D            | 52       | Missense      |
| 1081         | Post-PV/ET MF | NM_033360.4 | chr12:25378562-25378562 | c.436G>C          | 4           | p.A146P           | 23       | Missense      |
| 1178         | Post-PV/ET MF | NM_033360.4 | chr12:25398205-25398205 | c.111+2_111+3insG | 3           | -                 |          | Splice site   |
| 1217         | Post-PV/ET MF | NM_033360.4 | chr12:25380277-25380277 | c.181C>G          | 3           | p.Q61E            | 2        | Missense      |

# Supplementary Figure 2C

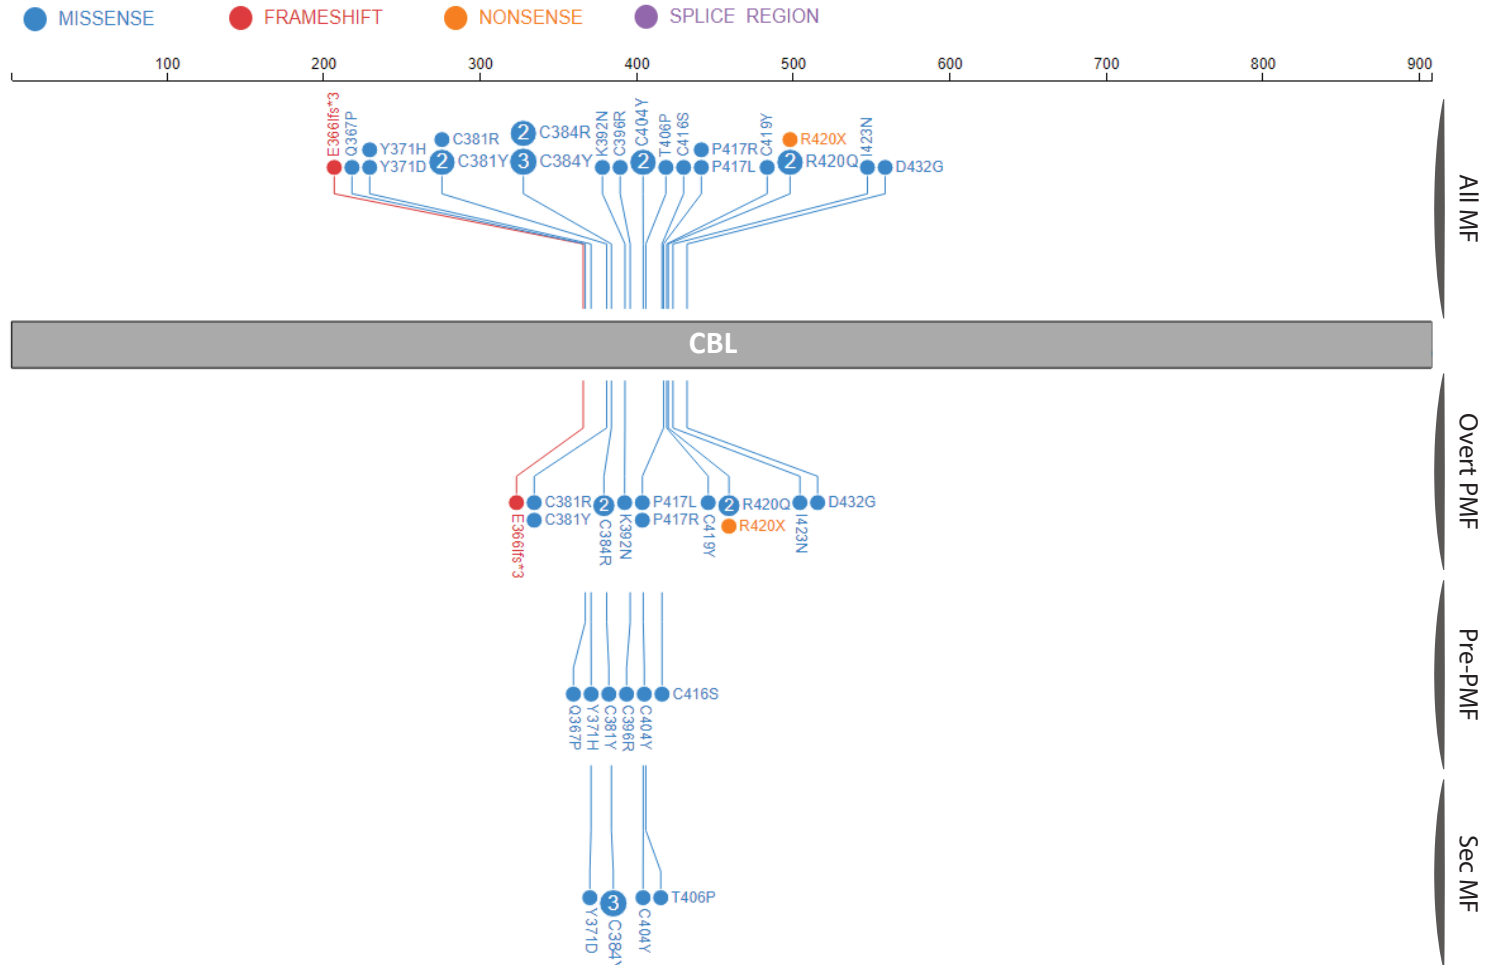

| CBL          |               |             |                           |                         |             |                   |         |               |
|--------------|---------------|-------------|---------------------------|-------------------------|-------------|-------------------|---------|---------------|
| Patient code | MF subtype    | Transcript  | Genome location           | Nucleotide change       | Exon/Intron | Amino acid change | CBL VAF | Mutation type |
| 15           | Pre-PMF       | NM_005188.3 | chr11:119148922-119148922 | c.1142G>A               | 8           | p.C381Y           | 18      | Missense      |
| 48           | Pre-PMF       | NM_005188.3 | chr11:119148880-119148880 | c.1100A>C               | 8           | p.Q367P           | 30      | Missense      |
| 58           | Pre-PMF       | NM_005188.3 | chr11:119148966-119148966 | c.1186T>C               | 8           | p.C396R           | 80      | Missense      |
| 88           | Overt PMF     | NM_005188.3 | chr11:119149242-119149242 | c.1250C>T               | 9           | p.P417L           |         | Missense      |
| 119          | Overt PMF     | NM_005188.3 | chr11:119148922-119148922 | c.1142G>A               | 8           | p.C381Y           | 13      | Missense      |
| 130          | Pre-PMF       | NM_005188.3 | chr11:119149239-119149239 | c.1247G>C               | 9           | p.C416S           | 6       | Missense      |
| 144          | Overt PMF     | NM_005188.3 | chr11:119149251-119149251 | c.1259G>A               | 9           | p.R420Q           |         | Missense      |
| 179          | Overt PMF     | NM_005188.3 | chr11:119149242-119149242 | c.1250C>G               | 9           | p.P417R           | 7       | Missense      |
| 197          | Pre-PMF       | NM_005188.3 | chr11:119148891-119148891 | c.1111T>C               | 8           | p.Y371H           | 47      | Missense      |
| 293          | Overt PMF     | NM_005188.3 | chr11:119149251-119149251 | c.1259G>A               | 9           | p.R420Q           | 34      | Missense      |
| 294          | Overt PMF     | NM_005188.3 | chr11:119149260-119149260 | c.1268T>A               | 9           | p.I423N           | 40      | Missense      |
| 302          | Pre-PMF       | NM_005188.3 | chr11:119148991-119148991 | c.1211G>A               | 8           | p.C404Y           | 48      | Missense      |
| 304          | Overt PMF     | NM_005188.3 | chr11:119148921-119148921 | c.1141T>C               | 8           | p.C381R           | 93      | Missense      |
| 322          | Overt PMF     | NM_005188.3 | chr11:119148930-119148930 | c.1150T>C               | 8           | p.C384R           | 82      | Missense      |
| 380          | Overt PMF     | NM_005188.3 | chr11:119148956-119148956 | c.1176G>T               | 8           | p.K392N           | 6       | Missense      |
| 391          | Overt PMF     | NM_005188.3 | chr11:119149250-119149250 | c.1258C>T               | 9           | p.R420*           | 78      | Nonsense      |
| 396          | Overt PMF     | NM_005188.3 | chr11:119149287-119149287 | c.1295A>G               | 9           | p.D432G           | 14      | Missense      |
| 399          | Overt PMF     | NM_005188.3 | chr11:119148554-119148555 | c.1095_1095+1insATCCCAT | 8           | p.E366Ifs*3       |         | Frameshift    |
| 416          | Overt PMF     | NM_005188.3 | chr11:119149248-119149248 | c.1256G>A               | 9           | p.C419Y           |         | Missense      |
| 429          | Overt PMF     | NM_005188.3 | chr11:119148930-119148930 | c.1150T>C               | 8           | p.C384R           | 5       | Missense      |
| 1024         | Post-PV/ET MF | NM_005188.3 | chr11:119148991-119148991 | c.1211G>A               | 8           | p.C404Y           | 42      | Missense      |
| 1080         | Post-PV/ET MF | NM_005188.3 | chr11:119148931-119148931 | c.1151G>A               | 8           | p.C384Y           | 43      | Missense      |
| 1145         | Post-PV/ET MF | NM_005188.3 | chr11:119148931-119148931 | c.1151G>A               | 8           | p.C384Y           |         | Missense      |
| 1196         | Post-PV/ET MF | NM_005188.3 | chr11:119148891-119148891 | c.1111T>G               | 8           | p.Y371D           | 36      | Missense      |
| 1248         | Post-PV/ET MF | NM_005188.3 | chr11:119148931-119148931 | c.1151G>A               | 8           | p.C384Y           | 20      | Missense      |
| 1253         | Post-PV/ET MF | NM_005188.3 | chr11:119148996-119148996 | c.1216A>C               | 8           | p.T406P           | 47      | Missense      |



# Supplementary Figure 3

## A

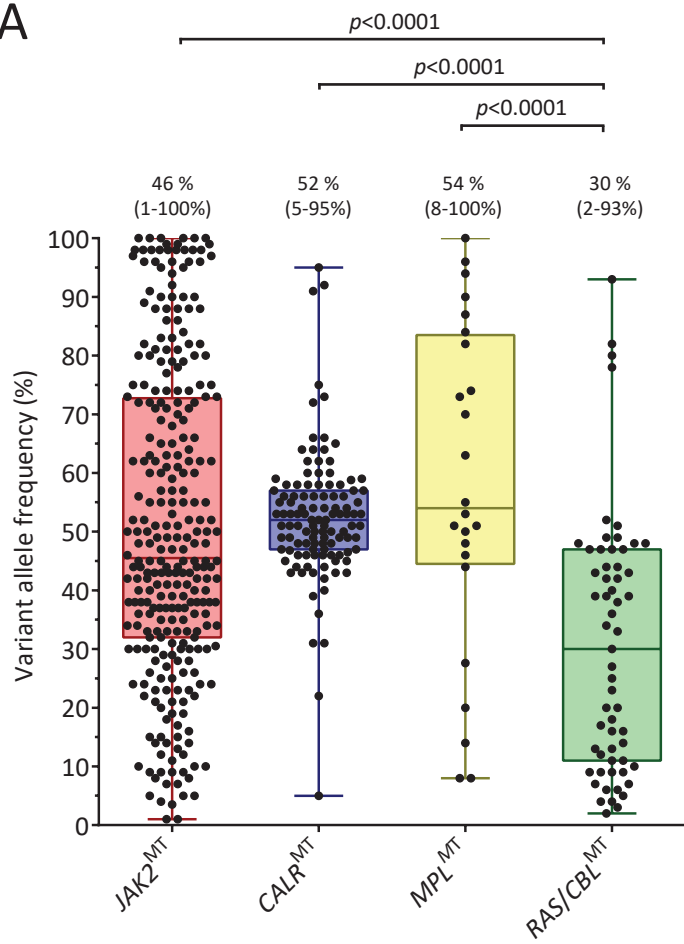

## B

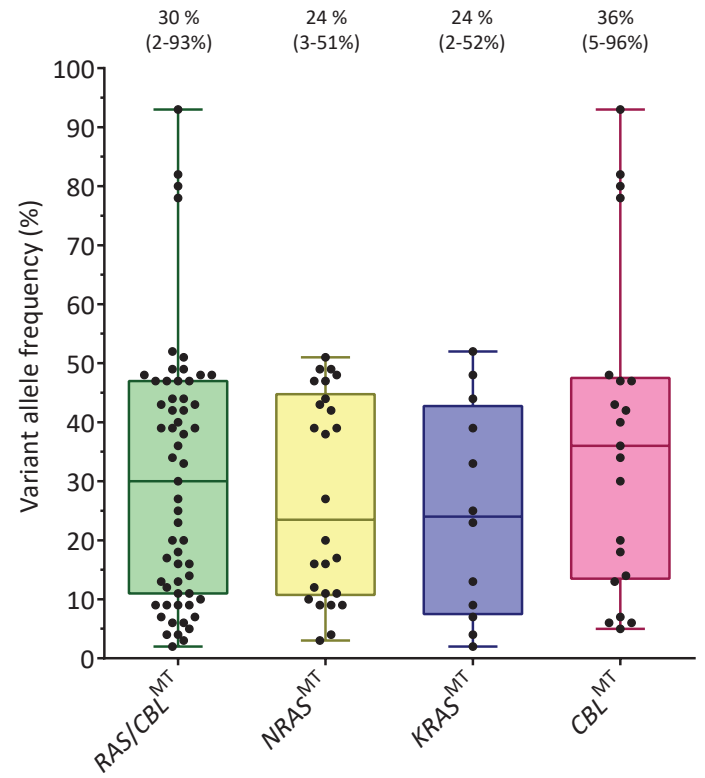

# Supplementary Figure 4

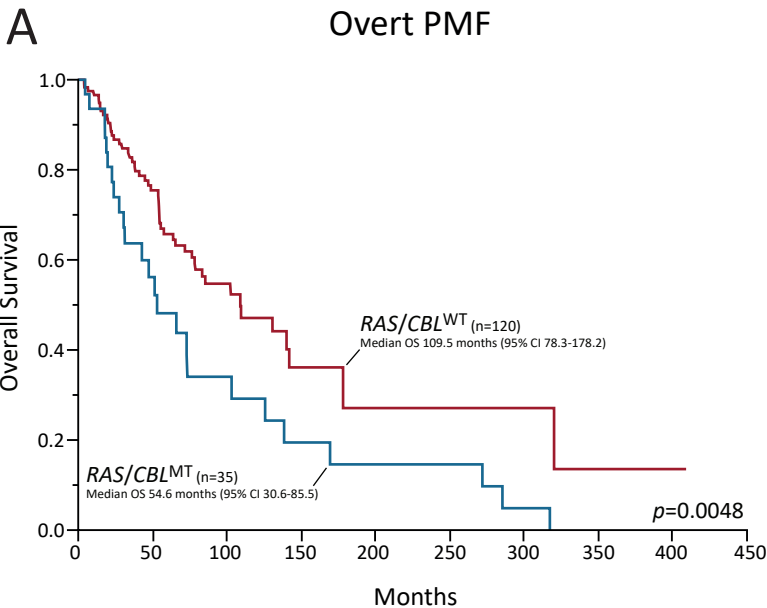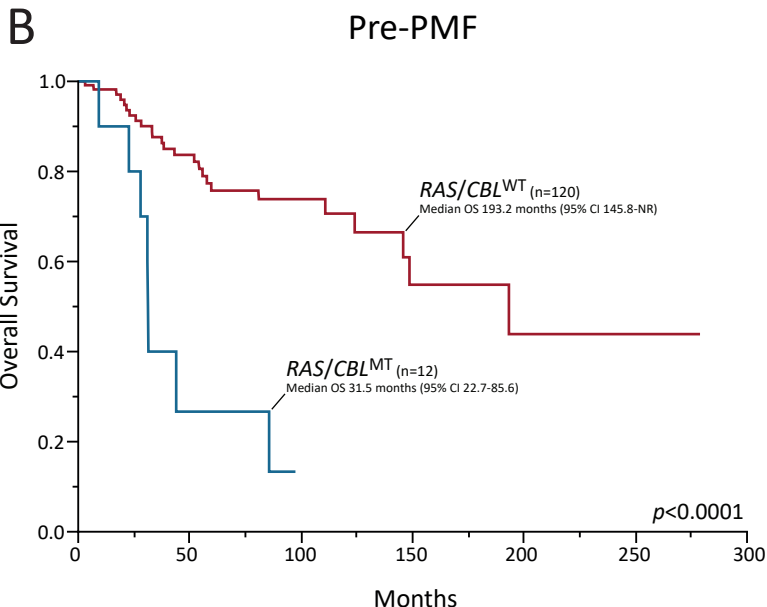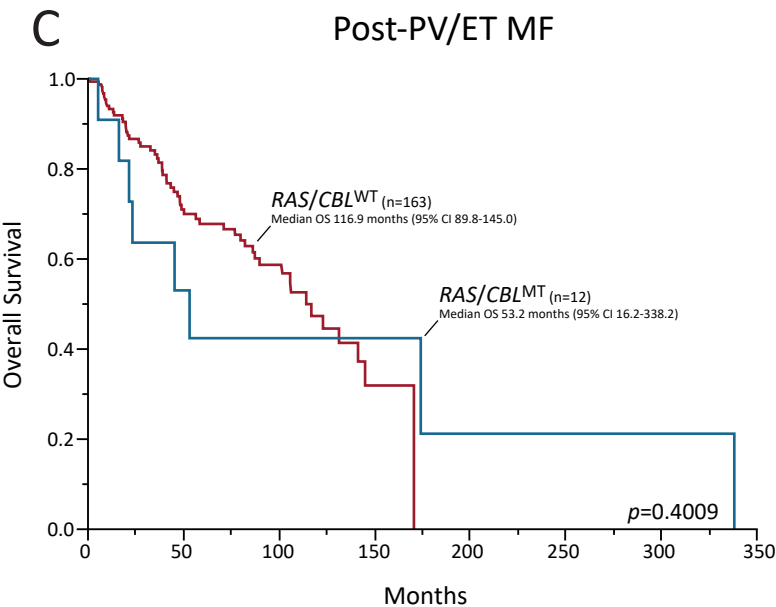

# Supplementary Figure 5

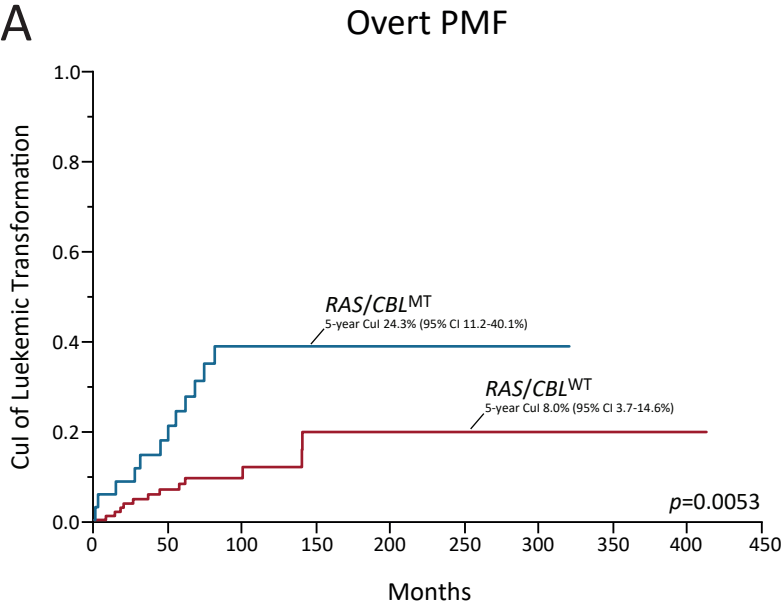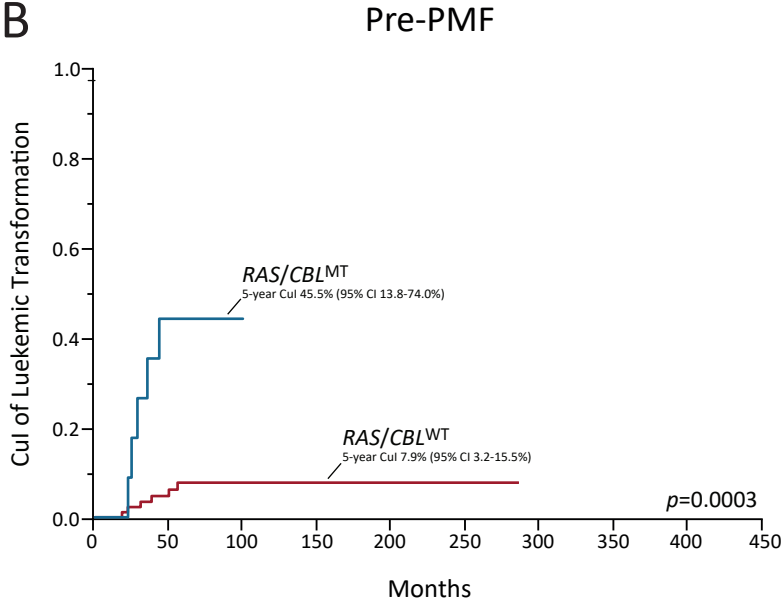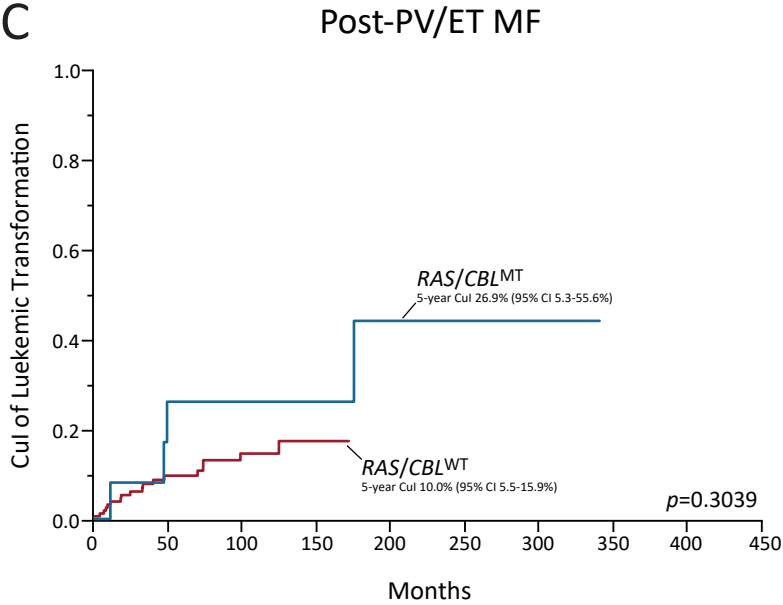

# Supplementary Figure 6

## A MIPSS70 vs *RAS/CBL*-enhanced MIPSS70 Risk distribution

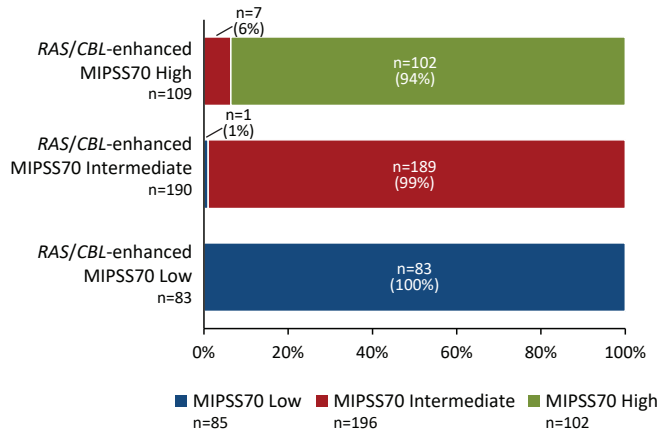

## B MIPSS70-plus vs *RAS/CBL*-enhanced MIPSS70-plus Risk distribution

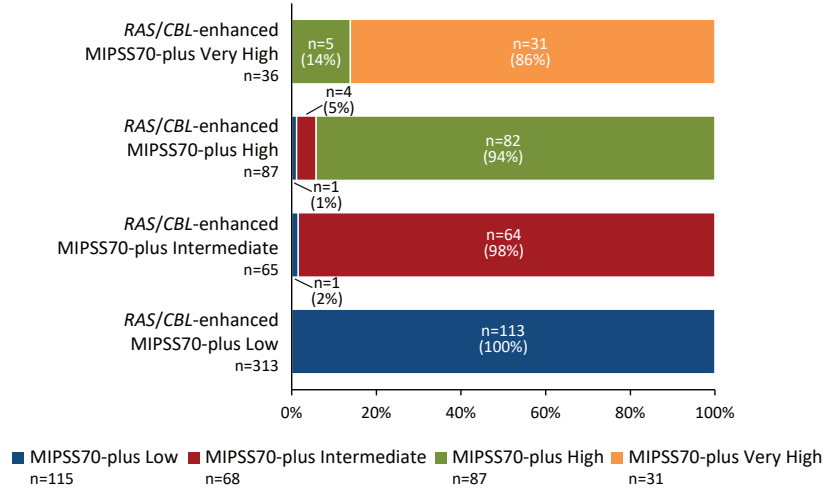

## C MIPSS70 vs *RAS/CBL*-enhanced MIPSS70 3-year ROC AUC for OS and LFS

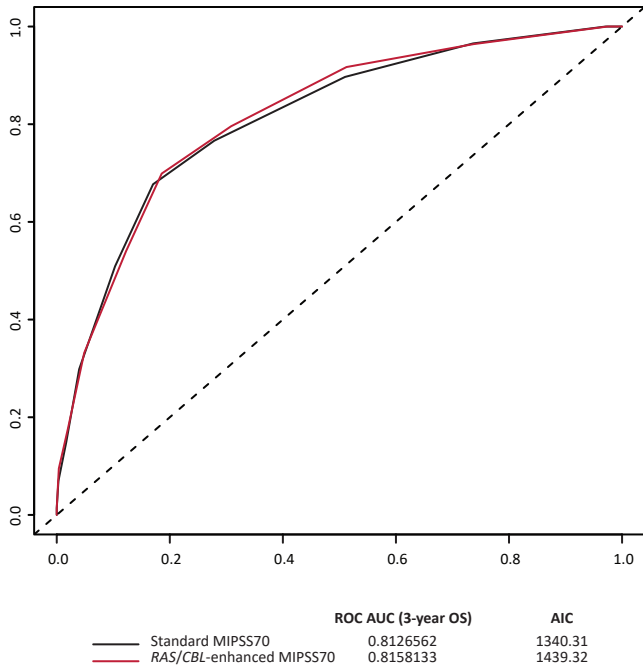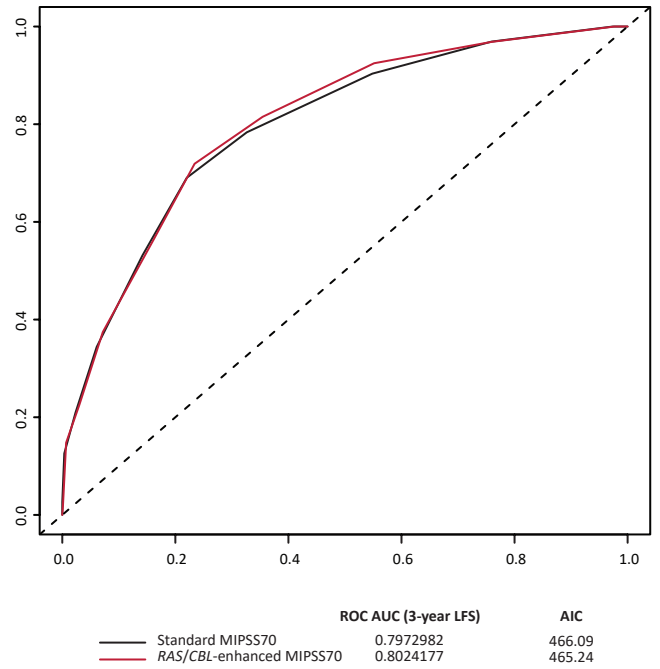

## D MIPSS70-plus vs *RAS/CBL*-enhanced MIPSS70-plus 3-year ROC AUC for OS and LFS

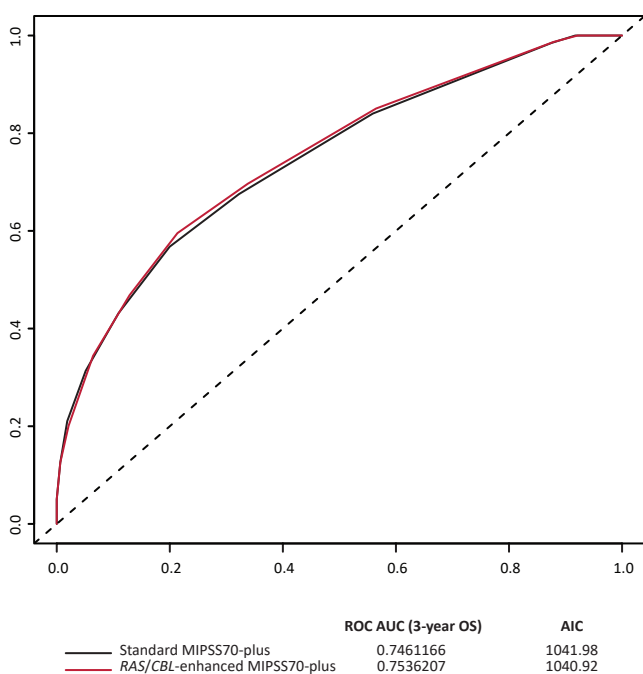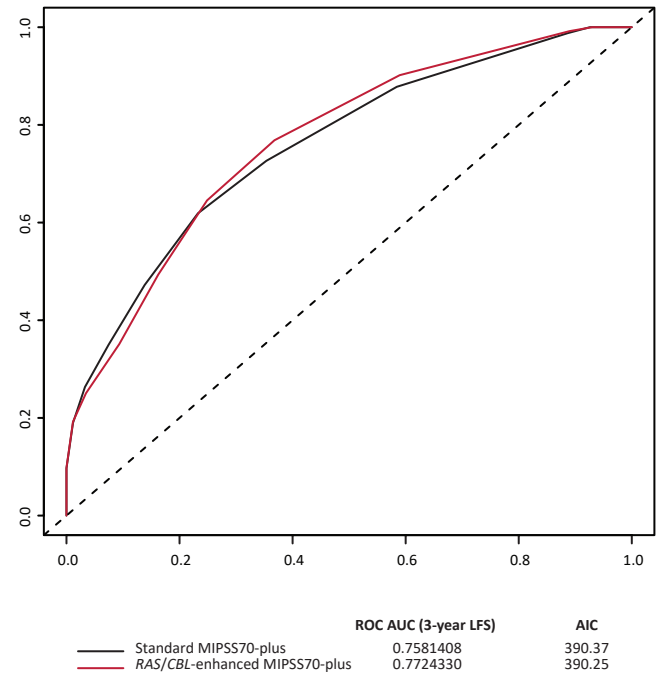

Supplement: advancesADV2020002175-suppl1.pdf [file advancesADV2020002175-suppl1.pdf]
